# Supplementary material for: Elucidating the non-covalent interactions in thiazole–carbon dioxide complexes through rotational spectroscopy and theoretical computations
Source: Royal Society of Chemistry journal article supplement (doi:10.1039/d4cp01755b), 2024-01-01
Supplement: d4cp01755b1.pdf [file d4cp01755b1.pdf]

## Electronic Supplementary Information

Elucidating the non-covalent interactions in the thiazole-carbon dioxide complexes through rotational spectroscopy and theoretical computations

Liuting Wang, Tingting Yang, Zhen Wang, and Gang Feng\*

School of Chemistry and Chemical Engineering, Chongqing University, Daxuecheng South Rd.  
55, 401331, Chongqing, China

### Contents:

**Table S1.** Geometries and spectroscopic parameters of the four most stable isomers of the thiazole-(CO<sub>2</sub>)<sub>2</sub> complex calculated at the B3LYP-D3BJ/def2-TZVP level of theory.

**Table S2.** The  $r_e$  coordinates of the most stable isomer of the thiazole-(CO<sub>2</sub>)<sub>2</sub> complex calculated at the B3LYP-D3BJ/def2-TZVP level of theory.

**Table S3.** Geometries and spectroscopic parameters of the four most stable isomers of the thiazole-(CO<sub>2</sub>)<sub>3</sub> complex calculated at the B3LYP-D3BJ/def2-TZVP level of theory.

**Table S4.** The  $r_e$  coordinates of the most stable isomer of the thiazole-(CO<sub>2</sub>)<sub>3</sub> complex calculated at the B3LYP-D3BJ/def2-TZVP level of theory.

**Table S5.** The result of NBO analysis for the most stable isomer of thiazole-CO<sub>2</sub> complex.

**Table S6.** The result of NBO analysis for the most stable isomer of thiazole-(CO<sub>2</sub>)<sub>2</sub> complex.

**Table S7.** The result of NBO analysis for the most stable isomer of thiazole-(CO<sub>2</sub>)<sub>3</sub> complex.

**Table S8.** Experimental transition frequencies of the parent species of the thiazole-CO<sub>2</sub> complex.

**Table S9.** Experimental transition frequencies of the <sup>13</sup>C2 isotopic species of the thiazole-CO<sub>2</sub> complex.

**Table S10.** Experimental transition frequencies of the <sup>13</sup>C5 isotopic species of the thiazole-CO<sub>2</sub> complex.

**Table S11.** Experimental transition frequencies of the <sup>34</sup>S6 isotopic species of the thiazole-CO<sub>2</sub> complex.

**Table S12.** Experimental transition frequencies of the <sup>13</sup>C7 isotopic species of the thiazole-CO<sub>2</sub> complex.

**Table S13.** Experimental transition frequencies of the <sup>13</sup>C8 isotopic species of the thiazole-CO<sub>2</sub> complex.

**Table S1.** Geometries and spectroscopic parameters of the four most stable isomers of the thiazole-(CO<sub>2</sub>)<sub>2</sub> complex calculated at the B3LYP-D3BJ/def2-TZVP level of theory.

| Isomer                            | TZ-2CO <sub>2</sub> _1                                                             | TZ-2CO <sub>2</sub> _2                                                              |
|-----------------------------------|------------------------------------------------------------------------------------|-------------------------------------------------------------------------------------|
|                                   | 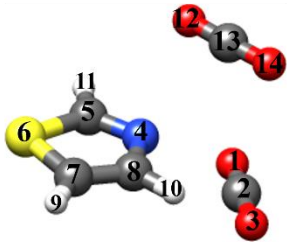  |   |
| $\Delta E$ (kJmol <sup>-1</sup> ) | 0                                                                                  | 2.4                                                                                 |
| $A, B, C$ (MHz)                   | 1269, 593, 479                                                                     | 1139, 733, 547                                                                      |
| $ \mu_{a, b, c} $ (D)             | 2.3, 0.2, 0.2                                                                      | 1.9, 0.6, 0.3                                                                       |
| Isomer                            | TZ-2CO <sub>2</sub> _3                                                             | TZ-2CO <sub>2</sub> _4                                                              |
|                                   |  |  |
| $\Delta E$ (kJmol <sup>-1</sup> ) | 4.9                                                                                | 12.0                                                                                |
| $A, B, C$ (MHz)                   | 1162, 487, 345                                                                     | 1381, 535, 465                                                                      |
| $ \mu_{a, b, c} $ (D)             | 1.8, 1.0, 0.0                                                                      | 0.2, 0.6, 1.5                                                                       |

**Table S2.** The  $r_e$  coordinates of the most stable isomer of the thiazole-(CO<sub>2</sub>)<sub>2</sub> complex calculated at the B3LYP-D3BJ/def2-TZVP level of theory.

| Atom | $a/\text{\AA}$ | $b/\text{\AA}$ | $c/\text{\AA}$ |
|------|----------------|----------------|----------------|
| N1   | -0.512         | -0.075         | 0.110          |
| C2   | -1.235         | -0.897         | 0.936          |
| C3   | -2.588         | -0.811         | 0.804          |
| S4   | -2.981         | 0.346          | -0.405         |
| C5   | -1.297         | 0.632          | -0.647         |
| H6   | -0.945         | 1.354          | -1.369         |
| H7   | -0.713         | -1.552         | 1.618          |
| H8   | -3.350         | -1.352         | 1.338          |
| O9   | 2.283          | -0.808         | -1.348         |
| C10  | 1.956          | -1.566         | -0.534         |
| O11  | 1.656          | -2.349         | 0.267          |
| O12  | 1.415          | 2.385          | -0.331         |
| C13  | 1.865          | 1.666          | 0.460          |
| O14  | 2.342          | 0.976          | 1.260          |

**Table S3.** Geometries and spectroscopic parameters of the four most stable isomers of the thiazole-(CO<sub>2</sub>)<sub>3</sub> complex calculated at the B3LYP-D3BJ/def2-TZVP level of theory.

| Isomer                            | TZ-3CO <sub>2</sub> _1 | TZ-3CO <sub>2</sub> _2 |
|-----------------------------------|------------------------|------------------------|
|                                   |                        |                        |
| $\Delta E$ (kJmol <sup>-1</sup> ) | 0                      | 0.5                    |
| $A, B, C$ (MHz)                   | 711, 464, 335          | 705, 394, 334          |
| $ \mu_a, b, c $ (D)               | 1.8, 1.3, 0.0          | 2.2, 0.7, 0.1          |
| Isomer                            | TZ-3CO <sub>2</sub> _3 | TZ-3CO <sub>2</sub> _4 |
|                                   |                        |                        |
| $\Delta E$ (kJmol <sup>-1</sup> ) | 0.7                    | 2.0                    |
| $A, B, C$ (MHz)                   | 647, 505, 350          | 667, 438, 395          |
| $ \mu_a, b, c $ (D)               | 2.0, 1.3, 0.2          | 2.1, 0.4, 0.2          |

**Table S4.** The  $r_e$  coordinates of the most stable isomer of the thiazole-(CO<sub>2</sub>)<sub>3</sub> complex calculated at the B3LYP-D3BJ/def2-TZVP level of theory.

| Atom | $a/\text{Å}$ | $b/\text{Å}$ | $c/\text{Å}$ |
|------|--------------|--------------|--------------|
| N1   | -0.348       | 0.785        | 0.349        |
| C2   | 0.644        | 0.742        | 1.294        |
| C3   | 1.733        | 1.517        | 1.030        |
| S4   | 1.512        | 2.339        | -0.464       |
| C5   | -0.029       | 1.581        | -0.628       |
| H6   | -0.662       | 1.767        | -1.482       |
| H7   | 0.522        | 0.113        | 2.163        |
| H8   | 2.626        | 1.642        | 1.619        |
| O9   | -3.283       | 1.212        | -0.581       |
| C10  | -3.247       | 0.431        | 0.275        |
| O11  | -3.256       | -0.350       | 1.132        |
| O12  | -0.309       | -2.382       | 0.557        |
| C13  | -0.972       | -2.039       | -0.330       |
| O14  | -1.637       | -1.727       | -1.227       |
| O15  | 3.120        | -1.688       | 0.753        |
| C16  | 2.545        | -1.457       | -0.227       |
| O17  | 1.984        | -1.231       | -1.217       |

**Table S5.** The result of NBO analysis for the most stable isomer of the thiazole-CO<sub>2</sub> complex.

| From thiazole to CO <sub>2</sub> |                           |                             | From CO <sub>2</sub> to thiazole |              |                             |
|----------------------------------|---------------------------|-----------------------------|----------------------------------|--------------|-----------------------------|
| Donor NBO <sup>a</sup>           | Acceptor NBO <sup>b</sup> | $E^{(2)}/\text{kJmol}^{-1}$ | Donor NBO                        | Acceptor NBO | $E^{(2)}/\text{kJmol}^{-1}$ |
| BD(1)C8-N4                       | RY*(4)C2                  | 0.21                        | BD(1)C2-O1                       | RY*(8)N4     | 0.59                        |
| BD(1)C8-N4                       | RY*(6)C2                  | 0.84                        | BD(1)C2-O1                       | RY*(1)N4     | 0.71                        |
| BD(1)C8-N4                       | RY*(5)O1                  | 0.29                        | BD(1)C2-O1                       | RY*(1)N4     | 0.21                        |
| BD(1)C8-H10                      | RY*(9)C2                  | 0.42                        | BD(2)C2-O1                       | LP(2)N4      | 0.29                        |
| BD(1)C5-N4                       | RY*(1)C2                  | 0.67                        | BD(3)C2-O1                       | RY*(3)N4     | 2.34                        |
| BD(1)C5-N4                       | RY*(7)C2                  | 0.42                        | BD(3)C2-O1                       | RY*(6)N4     | 0.21                        |
| BD(1)C5-H11                      | RY*(7)C2                  | 0.42                        | BD(3)C2-O1                       | RY*(1)N4     | 0.54                        |
| LP(1)N4                          | RY*(5)C2                  | 0.33                        | BD(3)C2-O1                       | BD*(1)C2-N4  | 0.84                        |
| LP(1)N4                          | RY*(5)C2                  | 0.29                        | BD(1)C2-O1                       | RY*(1)N4     | 0.37                        |
| LP(1)N4                          | RY*(24)C2                 | 0.33                        | BD(3)O3                          | BD*(1)S6-C2  | 0.21                        |
| LP(1)N4                          | RY*(3)O1                  | 0.67                        | BD(3)C2-O1                       | BD*(1)C8-N4  | 0.33                        |
| LP(1)N4                          | RY*(3)O3                  | 0.29                        |                                  |              |                             |
| LP(1)N4                          | BD*(3)C2-O1               | 5.90                        |                                  |              |                             |
| LP(2)N4                          | BD*(2)C2-O1               | 0.33                        |                                  |              |                             |

<sup>a</sup>BD for 2-center bond, LP for 1-center valence lone pair the unstarred and starred labels corresponding to Lewis and non-Lewis NBOs, respectively. <sup>b</sup>RY\* for 1-center Rydberg, and BD\* for 2-center antibond, the unstarred and starred labels corresponding to Lewis and non-Lewis NBOs, respectively.

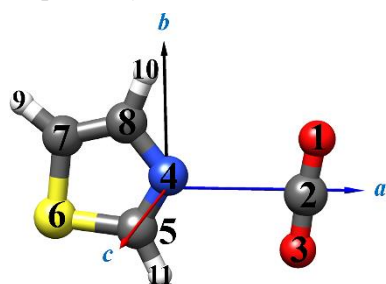

**Table S6.** The result of NBO analysis for the most stable isomer of thiazole-(CO<sub>2</sub>)<sub>2</sub> complex.

| From thiazole to CO <sub>2</sub> <sup>a</sup> |                           |                                              | From thiazole to CO <sub>2</sub> <sup>b</sup>                     |               |                                              |
|-----------------------------------------------|---------------------------|----------------------------------------------|-------------------------------------------------------------------|---------------|----------------------------------------------|
| Donor NBO <sup>c</sup>                        | Acceptor NBO <sup>d</sup> | <i>E</i> <sup>(2)</sup> /kJmol <sup>-1</sup> | Donor NBO                                                         | Acceptor NBO  | <i>E</i> <sup>(2)</sup> /kJmol <sup>-1</sup> |
| BD(1)C2–N1                                    | RY*(1)C10                 | 0.42                                         | BD(1)C2–N1                                                        | RY*(8)C13     | 0.25                                         |
| BD(1)C2–H7                                    | RY*(8)C10                 | 0.46                                         | BD(1)C2–H7                                                        | RY*(1)C13     | 0.25                                         |
| BD(1)C2–H7                                    | RY*(4)O11                 | 0.25                                         | BD(1)C5–N1                                                        | RY*(1)C13     | 0.38                                         |
| BD(1)C5–H6                                    | RY*(11)C10                | 0.29                                         | BD(2)C5–N1                                                        | RY*(2)C13     | 0.25                                         |
| LP(1)N1                                       | RY*(5)C10                 | 0.29                                         | BD(1)C5–H6                                                        | RY*(3)C13     | 0.54                                         |
| LP(1)N1                                       | RY*(3)O11                 | 0.25                                         | BD(1)C5–H6                                                        | RY*(6)O12     | 0.25                                         |
| LP(1)N1                                       | BD*(3)C10–O11             | 4.68                                         | BD(1)C5–H6                                                        | RY*(1)O12     | 0.25                                         |
| LP(2)N1                                       | BD*(3)C10–O11             | 2.01                                         | LP(1)N1                                                           | RY*(1)C13     | 0.29                                         |
|                                               |                           |                                              | LP(1)N1                                                           | RY*(1)O14     | 0.25                                         |
|                                               |                           |                                              | LP(1)N1                                                           | BD*(1)C13–O14 | 0.38                                         |
|                                               |                           |                                              | LP(1)N1                                                           | BD*(1)C13–O14 | 3.55                                         |
|                                               |                           |                                              | LP(1)N1                                                           | BD*(1)C13–O14 | 0.75                                         |
|                                               |                           |                                              | LP(1)N1                                                           | BD*(1)C13–O14 | 0.96                                         |
| From CO <sub>2</sub> <sup>a</sup> to thiazole |                           |                                              | From CO <sub>2</sub> <sup>a</sup> to CO <sub>2</sub> <sup>b</sup> |               |                                              |
| BD(1)C10–O11                                  | RY*(2)N1                  | 0.42                                         | LP(2)O9                                                           | BD*(2)C13–O14 | 0.54                                         |
| BD(3)C10–O11                                  | LP(2)N1                   | 0.42                                         | LP(2)O9                                                           | BD*(3)C13–O14 | 0.84                                         |
| BD(3)C10–O11                                  | BD*(1)C2–C3               | 0.33                                         | LP(3)O9                                                           | BD*(2)C13–O14 | 0.25                                         |
| BD(3)C10–O11                                  | BD*(2)C2–C3               | 0.25                                         |                                                                   |               |                                              |
| BD(3)C10–O11                                  | BD*(1)C5–N1               | 0.29                                         |                                                                   |               |                                              |
| From CO <sub>2</sub> <sup>b</sup> to thiazole |                           |                                              | From CO <sub>2</sub> <sup>b</sup> to CO <sub>2</sub> <sup>a</sup> |               |                                              |
| BD(1)C13–O14                                  | RY*(2)N1                  | 0.21                                         | BD(2)C13–O14                                                      | BD*(2)C10–O9  | 0.25                                         |
| BD(3)C13–O14                                  | LP(2)N1                   | 0.21                                         | BD(3)C13–O14                                                      | BD*(2)C10–O9  | 0.59                                         |
| BD(1)C13–O12                                  | RY*(2)N1                  | 0.29                                         | BD(3)C13–O14                                                      | BD*(3)C10–O9  | 0.25                                         |
| LP(2)O12                                      | RY*(10)N1                 | 0.25                                         | LP(1)O14                                                          | BD*(2)C10–O9  | 0.25                                         |
| LP(2)O12                                      | BD*(1)S4–C5               | 0.67                                         |                                                                   |               |                                              |
| LP(2)O12                                      | BD*(2)S4–C5               | 0.67                                         |                                                                   |               |                                              |

<sup>a</sup>The carbon atom number 10 of CO<sub>2</sub>. <sup>b</sup>The carbon atom number 13 of CO<sub>2</sub>. <sup>c</sup>BD for 2-center bond, LP for 1-center valence lone pair the unstarred and starred labels corresponding to Lewis and non-Lewis NBOs, respectively. <sup>d</sup>RY\* for 1-center Rydberg, and BD\* for 2-center antibond, the unstarred and starred labels corresponding to Lewis and non-Lewis NBOs, respectively.

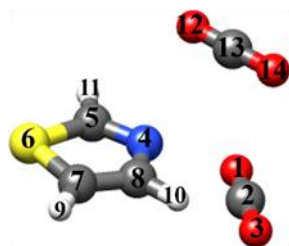

**Table S7.** The result of NBO analysis for the most stable isomer of the thiazole-(CO<sub>2</sub>)<sub>3</sub> complex.

| From thiazole to CO <sub>2</sub> <sup>a</sup>                     |                           |                                              | From thiazole to CO <sub>2</sub> <sup>b</sup>                     |               |                                              |
|-------------------------------------------------------------------|---------------------------|----------------------------------------------|-------------------------------------------------------------------|---------------|----------------------------------------------|
| Donor NBO <sup>c</sup>                                            | Acceptor NBO <sup>d</sup> | <i>E</i> <sup>(2)</sup> /kJmol <sup>-1</sup> | Donor NBO                                                         | Acceptor NBO  | <i>E</i> <sup>(2)</sup> /kJmol <sup>-1</sup> |
| BD(1)C2–N1                                                        | RY*(4)C10                 | 0.25                                         | BD(1)C2–N1                                                        | RY*(1)C13     | 0.29                                         |
| BD(1)C2–N1                                                        | RY*(6)C10                 | 0.33                                         | BD(1)C2–H7                                                        | RY*(8)C13     | 0.29                                         |
| BD(1)C5–N1                                                        | RY*(1)C10                 | 0.50                                         | BD(1)C2–H7                                                        | RY*(5)O12     | 0.29                                         |
| BD(1)C5–N1                                                        | RY*(8)C10                 | 0.21                                         | LP(1)N1                                                           | RY*(4)C13     | 0.25                                         |
| BD(1)C5–H6                                                        | RY*(8)C10                 | 0.38                                         | LP(1)N1                                                           | BD*(2)C13–O14 | 0.42                                         |
| BD(1)C5–H6                                                        | RY*(5)O9                  | 0.38                                         | LP(1)N1                                                           | BD*(3)C13–O14 | 2.80                                         |
| LP(1)N1                                                           | RY*(5)C10                 | 0.21                                         | LP(2)N1                                                           | BD*(2)C13–O14 | 1.38                                         |
| LP(1)N1                                                           | RY*(3)O9                  | 0.29                                         | LP(2)N1                                                           | BD*(3)C13–O14 | 2.42                                         |
| LP(1)N1                                                           | BD*(2)C10–O11             | 0.63                                         |                                                                   |               |                                              |
| LP(1)N1                                                           | BD*(3)C10–O11             | 4.77                                         |                                                                   |               |                                              |
| LP(2)N1                                                           | BD*(2)C10–O11             | 0.67                                         |                                                                   |               |                                              |
| LP(2)N1                                                           | BD*(3)C10–O11             | 0.50                                         |                                                                   |               |                                              |
| From thiazole to CO <sub>2</sub> <sup>c</sup>                     |                           |                                              | From CO <sub>2</sub> <sup>a</sup> to thiazole                     |               |                                              |
| BD(1)C2–C3                                                        | RY*(6)C16                 | 0.21                                         | BD(1)C10–O11                                                      | RY*(2)N1      | 0.33                                         |
| BD(1)C2–C3                                                        | RY*(7)C16                 | 0.21                                         | BD(1)C10–O9                                                       | RY*(2)N1      | 0.42                                         |
| BD(2)C2–C3                                                        | RY*(5)C16                 | 0.25                                         | LP(2)O9                                                           | RY*(10)N1     | 0.38                                         |
| BD(2)C2–C3                                                        | BD*(2)C16–O15             | 2.47                                         | LP(2)O9                                                           | BD*(1)S4–C5   | 0.67                                         |
|                                                                   |                           |                                              | LP(2)O9                                                           | BD*(2)S4–C5   | 0.38                                         |
|                                                                   |                           |                                              | BD(3)C10–O11                                                      | BD*(1)C2–N1   | 0.21                                         |
| From CO <sub>2</sub> <sup>b</sup> to thiazole                     |                           |                                              | From CO <sub>2</sub> <sup>b</sup> to CO <sub>2</sub> <sup>a</sup> |               |                                              |
| BD(1)C13–O12                                                      | RY*(2)N1                  | 0.29                                         | BD(3)C13–O14                                                      | BD*(2)C10–O11 | 0.29                                         |
| BD(2)C13–O14                                                      | LP(2)N1                   | 0.25                                         | BD(3)C13–O14                                                      | BD*(3)C10–O11 | 0.38                                         |
| BD(3)C13–O14                                                      | LP(2)N1                   | 0.42                                         | LP(1)O14                                                          | BD*(2)C10–O11 | 0.25                                         |
| LP(2)O12                                                          | BD*(2)C2–C3               | 0.79                                         |                                                                   |               |                                              |
| From CO <sub>2</sub> <sup>b</sup> to CO <sub>2</sub> <sup>c</sup> |                           |                                              | From CO <sub>2</sub> <sup>c</sup> to thiazole                     |               |                                              |
| LP(1)O12                                                          | BD*(3)C16–O15             | 0.46                                         | BD(3)C16–O15                                                      | BD*(2)C2–C3   | 0.25                                         |
| LP(2)O12                                                          | BD*(3)C16–O15             | 1.21                                         | LP(3)O17                                                          | LP(2)N1       | 0.21                                         |
| LP(3)O12                                                          | BD*(3)C16–O15             | 0.92                                         | LP(3)O17                                                          | BD*(3)S4–C5   | 0.21                                         |
|                                                                   |                           |                                              | BD*(3)C16–O15                                                     | BD*(2)C2–C3   | 3.93                                         |
| From CO <sub>2</sub> <sup>a</sup> to CO <sub>2</sub> <sup>b</sup> |                           |                                              | From CO <sub>2</sub> <sup>c</sup> to CO <sub>2</sub> <sup>b</sup> |               |                                              |
| BD(3)C10–O11                                                      | BD*(3)C13–O14             | 0.25                                         | LP(1)O17                                                          | BD*(2)C13–O14 | 0.29                                         |
|                                                                   |                           |                                              | LP(2)O17                                                          | BD*(2)C13–O14 | 1.30                                         |
|                                                                   |                           |                                              | LP(3)O17                                                          | BD*(2)C13–O14 | 0.25                                         |

<sup>a</sup>The carbon atom number 10 of CO<sub>2</sub>. <sup>b</sup>The carbon atom number 13 of CO<sub>2</sub>. <sup>c</sup>The carbon atom number 16 of CO<sub>2</sub>. <sup>d</sup>BD for 2-center bond, LP for 1-center valence lone pair the unstarred and starred labels corresponding to Lewis and non-Lewis NBOs, respectively. <sup>e</sup>RY\* for 1-center Rydberg, and BD\* for 2-center antibond, the unstarred and starred labels corresponding to Lewis and non-Lewis NBOs, respectively.



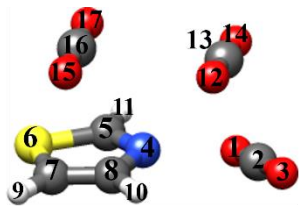

**Table S8.** Experimental transition frequencies of the parent species of the thiazole-CO<sub>2</sub> complex.

| $J'$ | $K_a'$ | $K_c'$ | $F'$ | $J''$ | $K_a''$ | $K_c''$ | $F''$ | $\nu_{\text{obs}}/\text{MHz}$ | $\Delta\nu_{\text{obs-calc}} (\text{MHz})$ |
|------|--------|--------|------|-------|---------|---------|-------|-------------------------------|--------------------------------------------|
| 4    | 0      | 4      | 3    | 3     | 0       | 3       | 2     | 5996.3870                     | -0.0027                                    |
| 4    | 0      | 4      | 4    | 3     | 0       | 3       | 3     | 5996.4686                     | 0.0025                                     |
| 4    | 0      | 4      | 5    | 3     | 0       | 3       | 4     | 5996.5063                     | -0.0005                                    |
| 4    | 2      | 3      | 4    | 3     | 2       | 2       | 4     | 6024.8101                     | 0.0011                                     |
| 4    | 2      | 3      | 5    | 3     | 2       | 2       | 2     | 6025.3666                     | -0.0008                                    |
| 4    | 2      | 3      | 3    | 3     | 2       | 2       | 3     | 6025.5088                     | -0.0001                                    |
| 4    | 2      | 2      | 4    | 3     | 2       | 1       | 3     | 6056.0019                     | 0.0004                                     |
| 4    | 2      | 2      | 5    | 3     | 2       | 1       | 4     | 6056.5491                     | -0.0006                                    |
| 4    | 2      | 2      | 3    | 3     | 2       | 1       | 2     | 6056.6919                     | 0.0006                                     |
| 4    | 1      | 3      | 3    | 3     | 1       | 2       | 3     | 6271.1175                     | 0.0006                                     |
| 4    | 1      | 3      | 5    | 3     | 1       | 2       | 2     | 6271.2425                     | 0.0021                                     |
| 4    | 1      | 3      | 5    | 3     | 1       | 2       | 4     | 6271.2793                     | 0.0000                                     |
| 5    | 1      | 5      | 5    | 4     | 1       | 4       | 4     | 7208.8215                     | -0.0009                                    |
| 5    | 1      | 5      | 4    | 4     | 1       | 4       | 3     | 7208.8617                     | -0.0020                                    |
| 5    | 1      | 5      | 6    | 4     | 1       | 4       | 5     | 7208.9158                     | -0.0008                                    |
| 5    | 0      | 5      | 4    | 4     | 0       | 4       | 3     | 7472.4623                     | 0.0022                                     |
| 5    | 0      | 5      | 5    | 4     | 0       | 4       | 4     | 7472.4934                     | -0.0017                                    |
| 5    | 0      | 5      | 6    | 4     | 0       | 4       | 5     | 7472.5278                     | -0.0009                                    |
| 5    | 2      | 4      | 5    | 4     | 2       | 3       | 4     | 7527.3569                     | 0.0008                                     |
| 5    | 2      | 4      | 6    | 4     | 2       | 3       | 5     | 7527.6504                     | 0.0014                                     |
| 5    | 2      | 4      | 4    | 4     | 2       | 3       | 3     | 7527.6774                     | -0.0012                                    |
| 5    | 3      | 3      | 5    | 4     | 3       | 2       | 4     | 7544.2975                     | -0.0004                                    |
| 5    | 3      | 3      | 6    | 4     | 3       | 2       | 5     | 7544.9227                     | -0.0014                                    |
| 5    | 3      | 3      | 4    | 4     | 3       | 2       | 3     | 7545.0804                     | 0.0025                                     |
| 5    | 3      | 2      | 5    | 4     | 3       | 1       | 4     | 7545.3265                     | 0.0003                                     |
| 5    | 3      | 2      | 6    | 4     | 3       | 1       | 5     | 7545.9516                     | -0.0004                                    |
| 5    | 3      | 2      | 4    | 4     | 3       | 1       | 3     | 7546.1074                     | 0.0013                                     |
| 5    | 2      | 3      | 5    | 4     | 2       | 2       | 4     | 7589.3788                     | -0.0004                                    |
| 5    | 2      | 3      | 6    | 4     | 2       | 2       | 5     | 7589.6611                     | 0.0011                                     |
| 5    | 2      | 3      | 4    | 4     | 2       | 2       | 3     | 7589.6871                     | -0.0012                                    |
| 5    | 1      | 4      | 5    | 4     | 1       | 3       | 4     | 7832.7101                     | -0.0013                                    |
| 5    | 1      | 4      | 4    | 4     | 1       | 3       | 3     | 7832.7659                     | 0.0014                                     |
| 5    | 1      | 4      | 6    | 4     | 1       | 3       | 5     | 7832.7978                     | -0.0032                                    |
| 6    | 1      | 6      | 6    | 5     | 1       | 5       | 5     | 8642.6892                     | 0.0025                                     |
| 6    | 1      | 6      | 5    | 5     | 1       | 5       | 4     | 8642.7085                     | 0.0018                                     |
| 6    | 1      | 6      | 7    | 5     | 1       | 5       | 6     | 8642.7502                     | 0.0033                                     |
| 6    | 0      | 6      | 5    | 5     | 0       | 5       | 4     | 8933.8802                     | -0.0009                                    |
| 6    | 0      | 6      | 6    | 5     | 0       | 5       | 5     | 8933.9003                     | 0.0039                                     |

|   |   |   |   |   |   |   |   |            |         |
|---|---|---|---|---|---|---|---|------------|---------|
| 6 | 0 | 6 | 7 | 5 | 0 | 5 | 6 | 8933.9249  | -0.0016 |
| 6 | 2 | 5 | 6 | 5 | 2 | 4 | 5 | 9027.1532  | 0.0021  |
| 6 | 2 | 5 | 5 | 5 | 2 | 4 | 4 | 9027.3276  | 0.0016  |
| 6 | 2 | 5 | 7 | 5 | 2 | 4 | 6 | 9027.3276  | 0.0015  |
| 6 | 3 | 4 | 6 | 5 | 3 | 3 | 5 | 9056.9356  | -0.0040 |
| 6 | 3 | 4 | 7 | 5 | 3 | 3 | 6 | 9057.3073  | 0.0006  |
| 6 | 3 | 4 | 5 | 5 | 3 | 3 | 4 | 9057.3608  | -0.0029 |
| 6 | 3 | 3 | 6 | 5 | 3 | 2 | 5 | 9059.6764  | -0.0006 |
| 6 | 3 | 3 | 7 | 5 | 3 | 2 | 6 | 9060.0435  | 0.0001  |
| 6 | 3 | 3 | 5 | 5 | 3 | 2 | 5 | 9060.0977  | -0.0026 |
| 6 | 2 | 4 | 6 | 5 | 2 | 3 | 5 | 9134.5868  | 0.0015  |
| 6 | 2 | 4 | 5 | 5 | 2 | 3 | 4 | 9134.7456  | 0.0011  |
| 6 | 2 | 4 | 7 | 5 | 2 | 3 | 6 | 9134.7456  | -0.0002 |
| 6 | 1 | 5 | 6 | 5 | 1 | 4 | 5 | 9389.8264  | 0.0004  |
| 6 | 1 | 5 | 5 | 5 | 1 | 4 | 4 | 9389.8536  | -0.0003 |
| 6 | 1 | 5 | 7 | 5 | 1 | 4 | 6 | 9389.8829  | -0.0003 |
| 7 | 1 | 7 | 7 | 6 | 1 | 6 | 6 | 10072.6330 | -0.0004 |
| 7 | 1 | 7 | 6 | 6 | 1 | 6 | 5 | 10072.6502 | 0.0055  |
| 7 | 1 | 7 | 8 | 6 | 1 | 6 | 7 | 10072.6732 | -0.0023 |
| 7 | 0 | 7 | 7 | 6 | 0 | 6 | 6 | 10378.9527 | -0.0001 |
| 7 | 0 | 7 | 6 | 6 | 0 | 6 | 5 | 10378.9527 | 0.0038  |
| 7 | 0 | 7 | 8 | 6 | 0 | 6 | 7 | 10378.9793 | -0.0018 |
| 7 | 2 | 6 | 7 | 6 | 2 | 5 | 6 | 10523.7480 | -0.0005 |
| 7 | 2 | 6 | 6 | 6 | 2 | 5 | 5 | 10523.8508 | -0.0033 |
| 7 | 2 | 6 | 8 | 6 | 2 | 5 | 7 | 10523.8669 | 0.0040  |
| 7 | 3 | 5 | 7 | 6 | 3 | 4 | 6 | 10570.9685 | -0.0006 |
| 7 | 3 | 5 | 8 | 6 | 3 | 4 | 7 | 10571.2049 | 0.0019  |
| 7 | 3 | 5 | 6 | 6 | 3 | 4 | 5 | 10571.2208 | -0.0035 |
| 7 | 3 | 4 | 7 | 6 | 3 | 3 | 6 | 10577.1096 | -0.0022 |
| 7 | 3 | 4 | 8 | 6 | 3 | 3 | 7 | 10577.3486 | 0.0040  |
| 7 | 3 | 4 | 6 | 6 | 3 | 3 | 5 | 10577.3636 | -0.0021 |
| 7 | 2 | 5 | 7 | 6 | 2 | 4 | 6 | 10692.8578 | -0.0043 |
| 7 | 2 | 5 | 6 | 6 | 2 | 4 | 5 | 10692.9436 | -0.0067 |
| 7 | 2 | 5 | 8 | 6 | 2 | 4 | 7 | 10692.9660 | 0.0057  |
| 7 | 1 | 6 | 7 | 6 | 1 | 5 | 6 | 10941.3131 | -0.0005 |
| 7 | 1 | 6 | 8 | 6 | 1 | 5 | 7 | 10941.3524 | -0.0017 |
| 8 | 1 | 8 | 8 | 7 | 1 | 7 | 7 | 11498.3479 | 0.0000  |
| 8 | 1 | 8 | 7 | 7 | 1 | 7 | 6 | 11498.3579 | 0.0032  |
| 8 | 1 | 8 | 9 | 7 | 1 | 7 | 8 | 11498.3758 | -0.0036 |
| 8 | 0 | 8 | 8 | 7 | 0 | 7 | 7 | 11807.0062 | 0.0043  |

|    |   |    |    |   |   |   |    |            |         |
|----|---|----|----|---|---|---|----|------------|---------|
| 8  | 0 | 8  | 7  | 7 | 0 | 7 | 6  | 11807.0062 | 0.0015  |
| 8  | 0 | 8  | 9  | 7 | 0 | 7 | 8  | 11807.0260 | -0.0027 |
| 8  | 2 | 7  | 8  | 7 | 2 | 6 | 7  | 12016.6652 | 0.0012  |
| 8  | 2 | 7  | 7  | 7 | 2 | 6 | 6  | 12016.7307 | -0.0022 |
| 8  | 2 | 7  | 9  | 7 | 2 | 6 | 8  | 12016.7486 | 0.0048  |
| 8  | 3 | 6  | 8  | 7 | 3 | 5 | 7  | 12086.3579 | -0.0005 |
| 8  | 3 | 6  | 9  | 7 | 3 | 5 | 8  | 12086.5144 | -0.0024 |
| 8  | 3 | 6  | 7  | 7 | 3 | 5 | 6  | 12086.5272 | 0.0039  |
| 8  | 3 | 5  | 8  | 7 | 3 | 4 | 7  | 12098.5943 | 0.0000  |
| 8  | 3 | 5  | 9  | 7 | 3 | 4 | 8  | 12098.7496 | -0.0012 |
| 8  | 3 | 5  | 7  | 7 | 3 | 4 | 6  | 12098.7496 | -0.0074 |
| 8  | 2 | 6  | 8  | 7 | 2 | 5 | 7  | 12264.3396 | 0.0025  |
| 8  | 2 | 6  | 7  | 7 | 2 | 5 | 6  | 12264.3817 | -0.0058 |
| 8  | 2 | 6  | 9  | 7 | 2 | 5 | 8  | 12264.4020 | 0.0025  |
| 8  | 1 | 7  | 8  | 7 | 1 | 6 | 7  | 12485.8632 | -0.0019 |
| 8  | 1 | 7  | 9  | 7 | 1 | 6 | 8  | 12485.8935 | -0.0028 |
| 9  | 0 | 9  | 9  | 8 | 0 | 8 | 8  | 13218.6570 | 0.0009  |
| 9  | 0 | 9  | 8  | 8 | 0 | 8 | 7  | 13218.6662 | 0.0031  |
| 9  | 0 | 9  | 10 | 8 | 0 | 8 | 9  | 13218.6786 | -0.0032 |
| 9  | 2 | 8  | 9  | 8 | 2 | 7 | 8  | 13505.4145 | 0.0015  |
| 9  | 2 | 8  | 10 | 8 | 2 | 7 | 9  | 13505.4759 | 0.0041  |
| 9  | 3 | 7  | 9  | 8 | 3 | 6 | 8  | 13602.9205 | 0.0020  |
| 9  | 3 | 7  | 8  | 8 | 3 | 6 | 7  | 13603.0323 | 0.0016  |
| 9  | 3 | 7  | 10 | 8 | 3 | 6 | 9  | 13603.0323 | 0.0014  |
| 9  | 3 | 6  | 9  | 8 | 3 | 5 | 8  | 13625.2161 | -0.0027 |
| 9  | 3 | 6  | 8  | 8 | 3 | 5 | 7  | 13625.3298 | 0.0015  |
| 9  | 3 | 6  | 10 | 8 | 3 | 5 | 9  | 13625.3298 | 0.0012  |
| 9  | 2 | 7  | 9  | 8 | 2 | 6 | 8  | 13847.8336 | 0.0067  |
| 9  | 2 | 7  | 8  | 8 | 2 | 6 | 7  | 13847.8530 | -0.0029 |
| 9  | 2 | 7  | 10 | 8 | 2 | 6 | 9  | 13847.8718 | 0.0042  |
| 9  | 1 | 8  | 9  | 8 | 1 | 7 | 8  | 14021.9978 | -0.0056 |
| 9  | 1 | 8  | 10 | 8 | 1 | 7 | 9  | 14022.0311 | 0.0019  |
| 10 | 1 | 10 | 10 | 9 | 1 | 9 | 9  | 14336.4464 | -0.0029 |
| 10 | 1 | 10 | 9  | 9 | 1 | 9 | 8  | 14336.4464 | -0.0073 |
| 10 | 1 | 10 | 11 | 9 | 1 | 9 | 10 | 14336.4731 | 0.0033  |
| 10 | 0 | 10 | 10 | 9 | 0 | 9 | 9  | 14615.7857 | -0.0050 |
| 10 | 0 | 10 | 9  | 9 | 0 | 9 | 8  | 14615.7926 | -0.0073 |
| 10 | 0 | 10 | 11 | 9 | 0 | 9 | 10 | 14615.8170 | 0.0018  |
| 10 | 2 | 9  | 10 | 9 | 2 | 8 | 9  | 14989.5321 | 0.0041  |
| 10 | 2 | 9  | 9  | 9 | 2 | 8 | 8  | 14989.5607 | -0.0024 |

|    |   |    |    |    |   |    |    |            |         |
|----|---|----|----|----|---|----|----|------------|---------|
| 10 | 2 | 9  | 11 | 9  | 2 | 8  | 10 | 14989.5758 | 0.0027  |
| 10 | 3 | 8  | 10 | 9  | 3 | 7  | 9  | 15120.3201 | 0.0007  |
| 10 | 3 | 8  | 9  | 9  | 3 | 7  | 8  | 15120.3992 | 0.0002  |
| 10 | 3 | 8  | 11 | 9  | 3 | 7  | 10 | 15120.3992 | -0.0028 |
| 10 | 3 | 7  | 10 | 9  | 3 | 6  | 9  | 15158.2347 | 0.0020  |
| 10 | 3 | 7  | 9  | 9  | 3 | 6  | 8  | 15158.3116 | 0.0031  |
| 10 | 3 | 7  | 11 | 9  | 3 | 6  | 10 | 15158.3116 | -0.0002 |
| 10 | 2 | 8  | 10 | 9  | 2 | 7  | 9  | 15440.8481 | -0.0026 |
| 10 | 2 | 8  | 9  | 9  | 2 | 7  | 8  | 15440.8660 | -0.0014 |
| 10 | 2 | 8  | 11 | 9  | 2 | 7  | 10 | 15440.8838 | 0.0057  |
| 10 | 1 | 9  | 10 | 9  | 1 | 8  | 9  | 15548.0808 | -0.0032 |
| 10 | 1 | 9  | 11 | 9  | 1 | 8  | 10 | 15548.1138 | 0.0071  |
| 11 | 1 | 11 | 11 | 10 | 1 | 10 | 10 | 15748.8331 | -0.0002 |
| 11 | 1 | 11 | 10 | 10 | 1 | 10 | 9  | 15748.8331 | -0.0043 |
| 11 | 1 | 11 | 12 | 10 | 1 | 10 | 11 | 15748.8530 | 0.0022  |
| 11 | 0 | 11 | 12 | 10 | 0 | 10 | 10 | 16001.2341 | -0.0040 |
| 11 | 0 | 11 | 11 | 10 | 0 | 10 | 11 | 16001.2664 | 0.0055  |
| 11 | 2 | 10 | 11 | 10 | 2 | 9  | 10 | 16468.5724 | 0.0032  |
| 11 | 2 | 10 | 10 | 10 | 2 | 9  | 9  | 16468.5908 | -0.0055 |
| 11 | 2 | 10 | 12 | 10 | 2 | 9  | 11 | 16468.6046 | -0.0006 |
| 11 | 3 | 9  | 11 | 10 | 3 | 8  | 10 | 16638.1030 | -0.0022 |
| 11 | 3 | 9  | 12 | 10 | 3 | 8  | 11 | 16638.1647 | -0.0032 |
| 11 | 3 | 8  | 11 | 10 | 3 | 7  | 10 | 16699.0189 | 0.0004  |
| 11 | 3 | 8  | 12 | 10 | 3 | 7  | 11 | 16699.0764 | -0.0001 |
| 11 | 2 | 9  | 11 | 10 | 2 | 8  | 10 | 17039.9204 | -0.0054 |
| 11 | 2 | 9  | 12 | 10 | 2 | 8  | 11 | 17039.9497 | 0.0049  |
| 11 | 1 | 10 | 11 | 10 | 1 | 9  | 10 | 17062.3139 | -0.0046 |
| 11 | 1 | 10 | 12 | 10 | 1 | 9  | 11 | 17062.3437 | 0.0043  |
| 4  | 1 | 4  | 3  | 3  | 0 | 3  | 2  | 9151.9499  | 0.0012  |
| 4  | 1 | 4  | 4  | 3  | 0 | 3  | 3  | 9152.1046  | -0.0019 |
| 4  | 1 | 4  | 5  | 3  | 0 | 3  | 4  | 9152.0834  | 0.0010  |
| 6  | 1 | 6  | 6  | 5  | 0 | 5  | 5  | 11534.6532 | -0.0013 |
| 6  | 1 | 6  | 5  | 5  | 0 | 5  | 4  | 11534.6698 | 0.0006  |
| 6  | 1 | 6  | 7  | 5  | 0 | 5  | 6  | 11534.7102 | 0.0000  |
| 7  | 1 | 7  | 7  | 6  | 0 | 6  | 6  | 12673.3907 | -0.0009 |
| 7  | 1 | 7  | 6  | 6  | 0 | 6  | 5  | 12673.4346 | 0.0018  |
| 7  | 1 | 7  | 8  | 6  | 0 | 6  | 7  | 12673.4580 | -0.0013 |
| 8  | 1 | 8  | 8  | 7  | 0 | 7  | 7  | 13792.7852 | -0.0014 |
| 8  | 1 | 8  | 7  | 7  | 0 | 7  | 6  | 13792.8393 | 0.0002  |
| 8  | 1 | 8  | 9  | 7  | 0 | 7  | 8  | 13792.8550 | -0.0026 |

|    |   |    |    |   |   |   |    |            |         |
|----|---|----|----|---|---|---|----|------------|---------|
| 2  | 2 | 0  | 1  | 1 | 1 | 1 | 1  | 14303.2937 | -0.0007 |
| 2  | 2 | 0  | 3  | 1 | 1 | 1 | 2  | 14304.4961 | 0.0012  |
| 2  | 2 | 0  | 2  | 1 | 1 | 1 | 1  | 14305.3405 | -0.0009 |
| 2  | 2 | 0  | 2  | 1 | 1 | 1 | 2  | 14305.8086 | -0.0022 |
| 9  | 1 | 9  | 9  | 8 | 0 | 8 | 8  | 14905.4252 | -0.0001 |
| 9  | 1 | 9  | 8  | 8 | 0 | 8 | 7  | 14905.4766 | -0.0037 |
| 9  | 1 | 9  | 10 | 8 | 0 | 8 | 9  | 14905.4985 | 0.0041  |
| 3  | 2 | 2  | 4  | 2 | 1 | 1 | 3  | 15558.1067 | -0.0030 |
| 3  | 2 | 2  | 3  | 2 | 1 | 1 | 2  | 15558.3901 | 0.0002  |
| 3  | 2 | 2  | 2  | 2 | 1 | 1 | 1  | 15558.8946 | 0.0013  |
| 3  | 2 | 1  | 2  | 2 | 1 | 2 | 1  | 15948.4784 | -0.0013 |
| 3  | 2 | 1  | 4  | 2 | 1 | 2 | 3  | 15948.9354 | 0.0022  |
| 3  | 2 | 1  | 3  | 2 | 1 | 2 | 2  | 15949.7527 | -0.0003 |
| 10 | 1 | 10 | 10 | 9 | 0 | 9 | 9  | 16023.2184 | -0.0001 |
| 10 | 1 | 10 | 9  | 9 | 0 | 9 | 8  | 16023.2717 | 0.0006  |
| 10 | 1 | 10 | 11 | 9 | 0 | 9 | 10 | 16023.2876 | 0.0053  |
| 4  | 2 | 3  | 3  | 3 | 1 | 2 | 2  | 16877.2217 | -0.0020 |
| 4  | 2 | 3  | 5  | 3 | 1 | 2 | 4  | 16877.3841 | 0.0013  |
| 4  | 2 | 3  | 4  | 3 | 1 | 2 | 3  | 16877.6880 | -0.0008 |
| 4  | 2 | 2  | 3  | 3 | 1 | 3 | 2  | 17673.7431 | 0.0017  |
| 4  | 2 | 2  | 5  | 3 | 1 | 3 | 4  | 17674.0160 | -0.0004 |
| 4  | 2 | 2  | 4  | 3 | 1 | 3 | 3  | 17674.6589 | -0.0011 |
| 5  | 2 | 4  | 4  | 4 | 1 | 3 | 3  | 18133.6634 | 0.0013  |
| 5  | 2 | 4  | 6  | 4 | 1 | 3 | 5  | 18133.7511 | -0.0013 |
| 5  | 2 | 4  | 5  | 4 | 1 | 3 | 4  | 18133.9301 | 0.0033  |
| 6  | 2 | 5  | 5  | 5 | 1 | 4 | 4  | 19328.2241 | 0.0005  |
| 6  | 2 | 5  | 7  | 5 | 1 | 4 | 6  | 19328.2788 | 0.0013  |
| 6  | 2 | 5  | 6  | 5 | 1 | 4 | 5  | 19328.3638 | -0.0026 |
| 5  | 2 | 3  | 4  | 4 | 1 | 4 | 3  | 19491.8653 | 0.0026  |
| 5  | 2 | 3  | 6  | 4 | 1 | 4 | 5  | 19492.0417 | -0.0011 |
| 5  | 2 | 3  | 5  | 4 | 1 | 4 | 4  | 19492.5752 | 0.0013  |

**Table S9.** Experimental transition frequencies of the  $^{13}\text{C}2$  isotopic species of the thiazole- $\text{CO}_2$  complex.

| $J'$ | $K_a'$ | $K_c'$ | $F'$ | $J''$ | $K_a''$ | $K_c''$ | $F''$ | $\nu_{\text{obs}}/\text{MHz}$ | $\Delta\nu_{\text{obs-calc}} (\text{MHz})$ |
|------|--------|--------|------|-------|---------|---------|-------|-------------------------------|--------------------------------------------|
| 4    | 0      | 4      | 3    | 3     | 0       | 3       | 2     | 5927.0614                     | -0.0061                                    |
| 4    | 0      | 4      | 4    | 3     | 0       | 3       | 3     | 5927.1462                     | 0.0020                                     |
| 4    | 0      | 4      | 5    | 3     | 0       | 3       | 4     | 5927.1885                     | 0.0038                                     |
| 5    | 1      | 5      | 5    | 4     | 1       | 4       | 4     | 7128.1468                     | -0.0008                                    |
| 5    | 1      | 5      | 4    | 4     | 1       | 4       | 3     | 7128.1888                     | 0.0000                                     |
| 5    | 1      | 5      | 6    | 4     | 1       | 4       | 5     | 7128.2427                     | 0.0009                                     |
| 5    | 0      | 5      | 4    | 4     | 0       | 4       | 3     | 7386.8877                     | 0.0004                                     |
| 5    | 0      | 5      | 5    | 4     | 0       | 4       | 4     | 7386.9249                     | 0.0023                                     |
| 5    | 0      | 5      | 6    | 4     | 0       | 4       | 5     | 7386.9535                     | -0.0024                                    |
| 6    | 0      | 6      | 5    | 5     | 0       | 5       | 4     | 8832.7086                     | 0.0016                                     |
| 6    | 0      | 6      | 6    | 5     | 0       | 5       | 5     | 8832.7206                     | -0.0019                                    |
| 6    | 0      | 6      | 7    | 5     | 0       | 5       | 6     | 8832.7525                     | 0.0001                                     |

**Table S10.** Experimental transition frequencies of the  $^{13}\text{C}5$  isotopic species of the thiazole- $\text{CO}_2$  complex.

| $J'$ | $K_a'$ | $K_c'$ | $F'$ | $J''$ | $K_a''$ | $K_c''$ | $F''$ | $\nu_{\text{obs}}/\text{MHz}$ | $\Delta\nu_{\text{obs-calc}} (\text{MHz})$ |
|------|--------|--------|------|-------|---------|---------|-------|-------------------------------|--------------------------------------------|
| 4    | 0      | 4      | 4    | 3     | 0       | 3       | 3     | 5989.6134                     | -0.0036                                    |
| 4    | 0      | 4      | 5    | 3     | 0       | 3       | 4     | 5989.6578                     | 0.0000                                     |
| 5    | 1      | 5      | 4    | 4     | 1       | 4       | 4     | 7199.4427                     | 0.0047                                     |
| 5    | 1      | 5      | 6    | 4     | 1       | 4       | 3     | 7199.4797                     | 0.0004                                     |
| 5    | 1      | 5      | 4    | 4     | 1       | 4       | 5     | 7199.5347                     | 0.0025                                     |
| 5    | 0      | 5      | 4    | 4     | 0       | 4       | 3     | 7463.5646                     | 0.0019                                     |
| 5    | 0      | 5      | 5    | 4     | 0       | 4       | 4     | 7463.5998                     | 0.0021                                     |
| 5    | 0      | 5      | 6    | 4     | 0       | 4       | 5     | 7463.6311                     | -0.0002                                    |
| 6    | 1      | 6      | 6    | 5     | 1       | 5       | 5     | 8631.3136                     | -0.0015                                    |
| 6    | 1      | 6      | 7    | 5     | 1       | 5       | 6     | 8631.3704                     | -0.0049                                    |
| 6    | 0      | 6      | 5    | 5     | 0       | 5       | 6     | 8922.7361                     | -0.0027                                    |
| 6    | 0      | 6      | 6    | 5     | 0       | 5       | 4     | 8922.7586                     | 0.0046                                     |
| 6    | 0      | 6      | 7    | 5     | 0       | 5       | 5     | 8922.7817                     | -0.0025                                    |

**Table S11.** Experimental transition frequencies of the  $^{34}\text{S6}$  isotopic species of the thiazole- $\text{CO}_2$  complex.

| $J'$ | $K_a'$ | $K_c'$ | $F'$ | $J''$ | $K_a''$ | $K_c''$ | $F''$ | $\nu_{\text{obs}}/\text{MHz}$ | $\Delta\nu_{\text{obs-calc}} (\text{MHz})$ |
|------|--------|--------|------|-------|---------|---------|-------|-------------------------------|--------------------------------------------|
| 5    | 1      | 5      | 5    | 4     | 1       | 4       | 4     | 7089.5335                     | -0.0056                                    |
| 5    | 1      | 5      | 4    | 4     | 1       | 4       | 3     | 7089.5899                     | 0.0095                                     |
| 5    | 1      | 5      | 6    | 4     | 1       | 4       | 5     | 7089.6301                     | -0.0031                                    |
| 5    | 0      | 5      | 4    | 4     | 0       | 4       | 3     | 7347.1043                     | 0.0010                                     |
| 5    | 0      | 5      | 5    | 4     | 0       | 4       | 4     | 7347.1398                     | 0.0012                                     |
| 5    | 0      | 5      | 6    | 4     | 0       | 4       | 5     | 7347.1668                     | -0.0052                                    |
| 6    | 1      | 6      | 6    | 5     | 1       | 5       | 5     | 8499.9126                     | -0.0026                                    |
| 6    | 1      | 6      | 5    | 5     | 1       | 5       | 4     | 8499.9374                     | 0.0022                                     |
| 6    | 1      | 6      | 7    | 5     | 1       | 5       | 6     | 8499.9711                     | -0.0042                                    |
| 6    | 0      | 6      | 5    | 5     | 0       | 5       | 4     | 8785.0049                     | -0.0014                                    |
| 6    | 0      | 6      | 6    | 5     | 0       | 5       | 5     | 8785.0282                     | 0.0062                                     |
| 6    | 0      | 6      | 7    | 5     | 0       | 5       | 6     | 8785.0500                     | -0.0018                                    |
| 7    | 1      | 7      | 7    | 6     | 1       | 6       | 6     | 9906.5454                     | -0.0008                                    |
| 7    | 1      | 7      | 6    | 6     | 1       | 6       | 5     | 9906.5624                     | 0.0049                                     |
| 7    | 1      | 7      | 8    | 6     | 1       | 6       | 7     | 9906.5913                     | 0.0029                                     |
| 7    | 0      | 7      | 7    | 6     | 0       | 6       | 6     | 10207.2626                    | 0.0021                                     |
| 7    | 0      | 7      | 6    | 6     | 0       | 6       | 5     | 10207.2626                    | 0.0064                                     |
| 7    | 0      | 7      | 8    | 6     | 0       | 6       | 7     | 10207.2826                    | -0.0058                                    |
| 8    | 1      | 8      | 8    | 7     | 1       | 7       | 7     | 11309.1268                    | 0.0027                                     |
| 8    | 1      | 8      | 7    | 7     | 1       | 7       | 6     | 11309.1335                    | 0.0022                                     |
| 8    | 1      | 8      | 9    | 7     | 1       | 7       | 8     | 11309.1475                    | -0.0080                                    |
| 8    | 0      | 8      | 8    | 7     | 0       | 7       | 7     | 11613.1474                    | -0.0065                                    |
| 8    | 0      | 8      | 7    | 7     | 0       | 7       | 6     | 11613.1474                    | 0.0039                                     |
| 8    | 0      | 8      | 9    | 7     | 0       | 7       | 8     | 11613.1655                    | -0.0021                                    |
| 9    | 0      | 9      | 10   | 8     | 0       | 8       | 9     | 13003.1642                    | -0.0019                                    |



**Table S12.** Experimental transition frequencies of the  $^{13}\text{C7}$  isotopic species of the thiazole- $\text{CO}_2$  complex.

| $J'$ | $K_a'$ | $K_c'$ | $F'$ | $J''$ | $K_a''$ | $K_c''$ | $F''$ | $\nu_{\text{obs}}/\text{MHz}$ | $\Delta\nu_{\text{obs-calc}} \text{ (MHz)}$ |
|------|--------|--------|------|-------|---------|---------|-------|-------------------------------|---------------------------------------------|
| 5    | 1      | 5      | 5    | 4     | 1       | 4       | 4     | 7152.2206                     | -0.0011                                     |
| 5    | 1      | 5      | 4    | 4     | 1       | 4       | 3     | 7152.2614                     | -0.0016                                     |
| 5    | 1      | 5      | 6    | 4     | 1       | 4       | 5     | 7152.3152                     | -0.0007                                     |
| 5    | 0      | 5      | 4    | 4     | 0       | 4       | 3     | 7414.1613                     | 0.0011                                      |
| 5    | 0      | 5      | 5    | 4     | 0       | 4       | 4     | 7414.1940                     | -0.0011                                     |
| 5    | 0      | 5      | 6    | 4     | 0       | 4       | 5     | 7414.2224                     | -0.0064                                     |
| 6    | 1      | 6      | 6    | 5     | 1       | 5       | 5     | 8574.7758                     | 0.0012                                      |
| 6    | 1      | 6      | 5    | 5     | 1       | 5       | 4     | 8574.7982                     | 0.0036                                      |
| 6    | 1      | 6      | 7    | 5     | 1       | 5       | 6     | 8574.8340                     | -0.0007                                     |
| 6    | 0      | 6      | 7    | 5     | 0       | 5       | 4     | 8863.9562                     | -0.0004                                     |
| 6    | 0      | 6      | 5    | 5     | 0       | 5       | 5     | 8863.9767                     | 0.0048                                      |
| 6    | 0      | 6      | 6    | 5     | 0       | 5       | 6     | 8864.0007                     | -0.0013                                     |
| 6    | 1      | 5      | 6    | 5     | 1       | 4       | 5     | 9317.7367                     | -0.0009                                     |
| 6    | 1      | 5      | 5    | 5     | 1       | 4       | 4     | 9317.7683                     | 0.0026                                      |
| 6    | 1      | 5      | 7    | 5     | 1       | 4       | 6     | 9317.7945                     | -0.0004                                     |

**Table S13.** Experimental transition frequencies of the  $^{13}\text{C8}$  isotopic species of the thiazole- $\text{CO}_2$  complex.

| $J'$ | $K_a'$ | $K_c'$ | $F'$ | $J''$ | $K_a''$ | $K_c''$ | $F''$ | $\nu_{\text{obs}}/\text{MHz}$ | $\Delta\nu_{\text{obs-calc}} \text{ (MHz)}$ |
|------|--------|--------|------|-------|---------|---------|-------|-------------------------------|---------------------------------------------|
| 4    | 1      | 3      | 3    | 3     | 1       | 2       | 2     | 6260.6609                     | -0.0021                                     |
| 4    | 1      | 3      | 5    | 3     | 1       | 2       | 4     | 6260.7030                     | 0.0010                                      |
| 5    | 1      | 5      | 5    | 4     | 1       | 4       | 4     | 7187.9424                     | -0.0006                                     |
| 5    | 1      | 5      | 4    | 4     | 1       | 4       | 3     | 7187.9814                     | -0.0030                                     |
| 5    | 1      | 5      | 6    | 4     | 1       | 4       | 5     | 7188.0360                     | -0.0013                                     |
| 5    | 1      | 4      | 4    | 4     | 1       | 3       | 3     | 7819.2617                     | 0.0022                                      |
| 5    | 1      | 4      | 6    | 4     | 1       | 3       | 5     | 7819.2934                     | -0.0026                                     |
| 6    | 1      | 6      | 6    | 5     | 1       | 5       | 5     | 8617.3089                     | -0.0007                                     |
| 6    | 1      | 6      | 5    | 5     | 1       | 5       | 4     | 8617.3348                     | 0.0050                                      |
| 6    | 1      | 6      | 7    | 5     | 1       | 5       | 6     | 8617.3701                     | 0.0001                                      |
| 6    | 0      | 6      | 5    | 5     | 0       | 5       | 4     | 8909.3935                     | -0.0024                                     |
| 6    | 0      | 6      | 6    | 5     | 0       | 5       | 5     | 8909.4147                     | 0.0038                                      |
| 6    | 0      | 6      | 7    | 5     | 0       | 5       | 6     | 8909.4394                     | -0.0019                                     |
| 6    | 1      | 5      | 6    | 5     | 1       | 4       | 5     | 9373.1854                     | 0.0023                                      |
| 6    | 1      | 5      | 5    | 5     | 1       | 4       | 4     | 9373.2103                     | -0.0008                                     |
| 6    | 1      | 5      | 7    | 5     | 1       | 4       | 6     | 9373.2403                     | -0.0001                                     |
